# Supplementary material for: Microwave assisted sol–gel approach for Zr doped TiO2 as a benign photocatalyst for bismark brown red dye pollutant
Source: Royal Society of Chemistry journal article supplement (doi:10.1039/d3ra00328k), 2023-01-01

**Supplementary information**

S1 FESEM images of ZT<sub>4</sub>M at different microwave power levels. a) 180 W, b) 360 W, c) 540 W, d) 720 W, and e) 900W

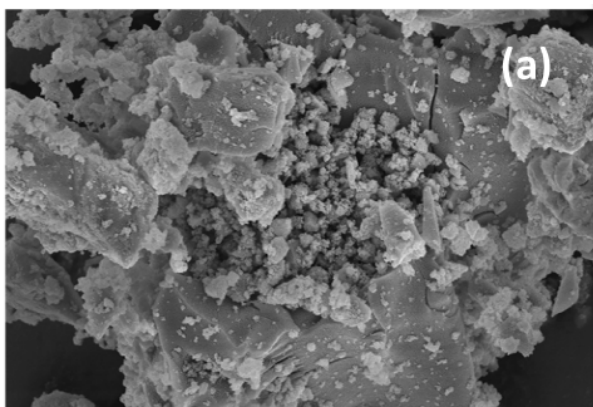

1 µm EHT = 10.00 kV Signal A = InLens System Vacuum = 1.54e-06 mbar  
WD = 8.0 mm Mag = 10.00 K X Gun Vacuum = 1.82e-09 mbar ZEISS

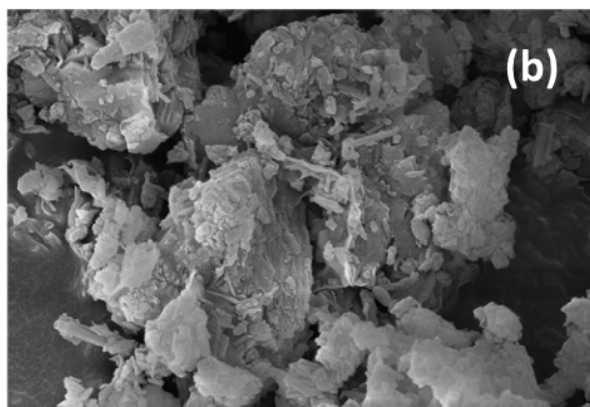

1 µm EHT = 10.00 kV Signal A = InLens System Vacuum = 8.44e-07 mbar  
WD = 6.8 mm Mag = 25.00 K X Gun Vacuum = 1.82e-09 mbar ZEISS

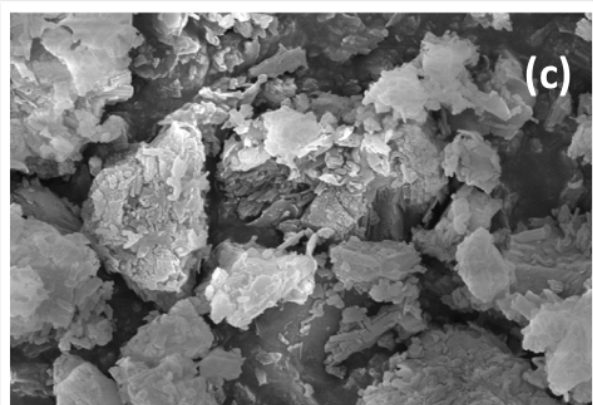

1 µm EHT = 10.00 kV Signal A = InLens System Vacuum = 7.75e-07 mbar  
WD = 6.8 mm Mag = 25.00 K X Gun Vacuum = 1.82e-09 mbar ZEISS

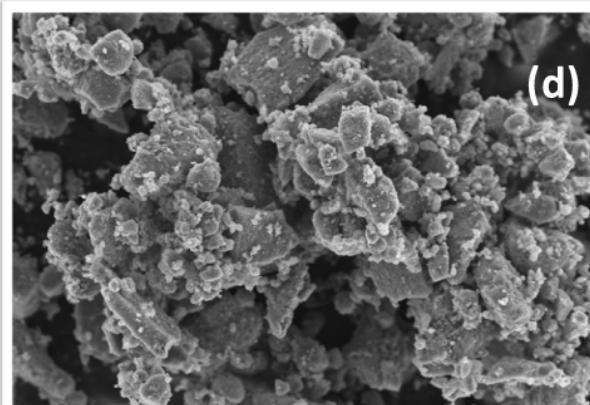

1 µm EHT = 5.00 kV Signal A = InLens ESB Grid = 0 V Date: 2 Sep 2016  
WD = 3.2 mm Mag = 10.14 K X ESB Grid is = 0 V Time: 9:58:00 ZEISS

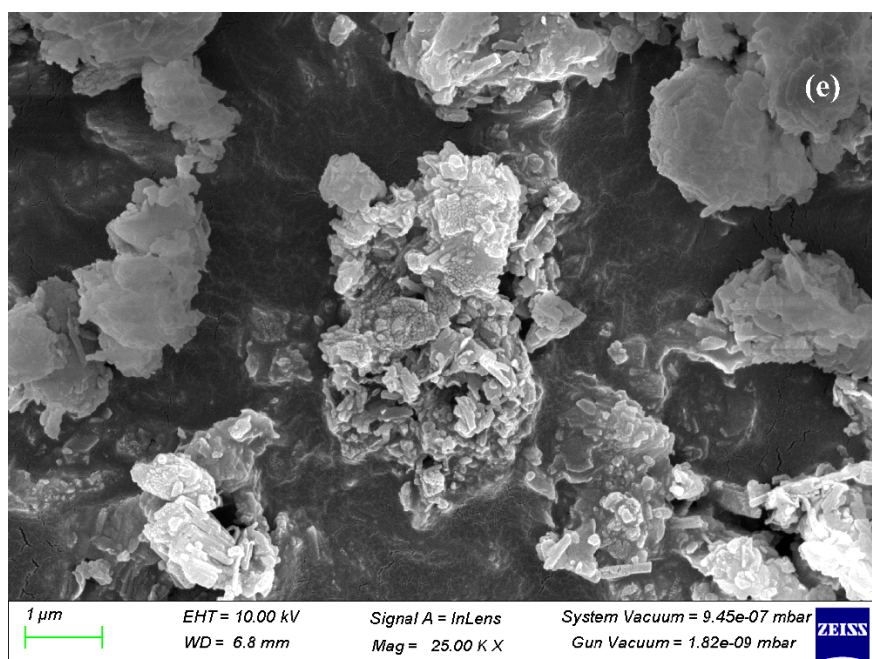

1 µm EHT = 10.00 kV Signal A = InLens System Vacuum = 9.45e-07 mbar  
WD = 6.8 mm Mag = 25.00 K X Gun Vacuum = 1.82e-09 mbar ZEISS

S2 XRF analysis a)ZT<sub>1</sub> b)ZT<sub>2</sub> c) ZT<sub>3</sub> d)ZT<sub>4</sub> e)ZT<sub>5</sub>

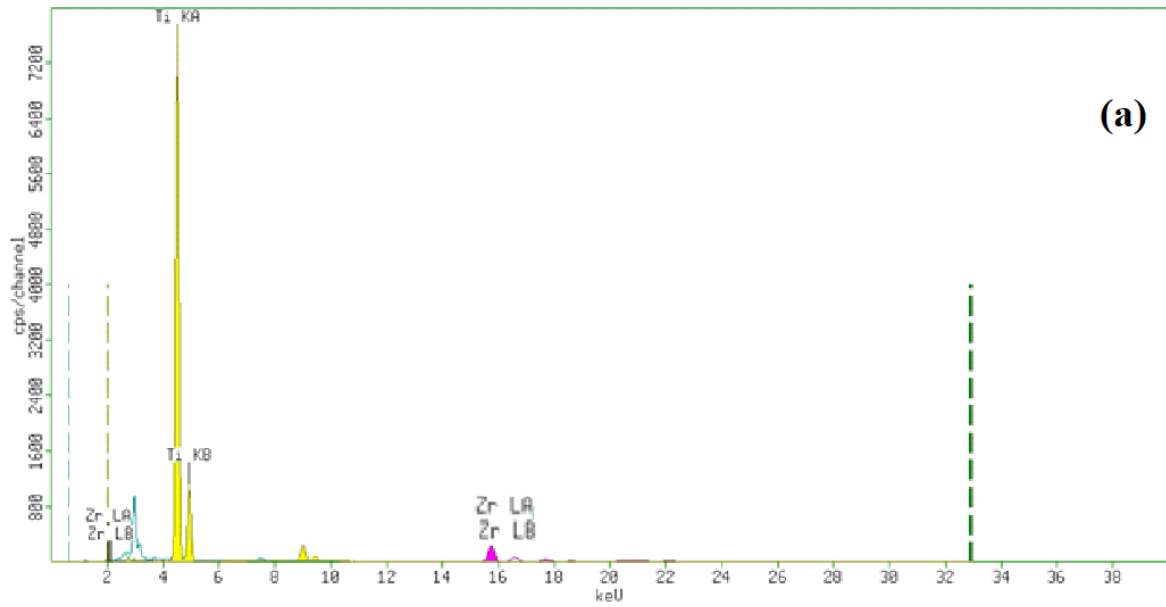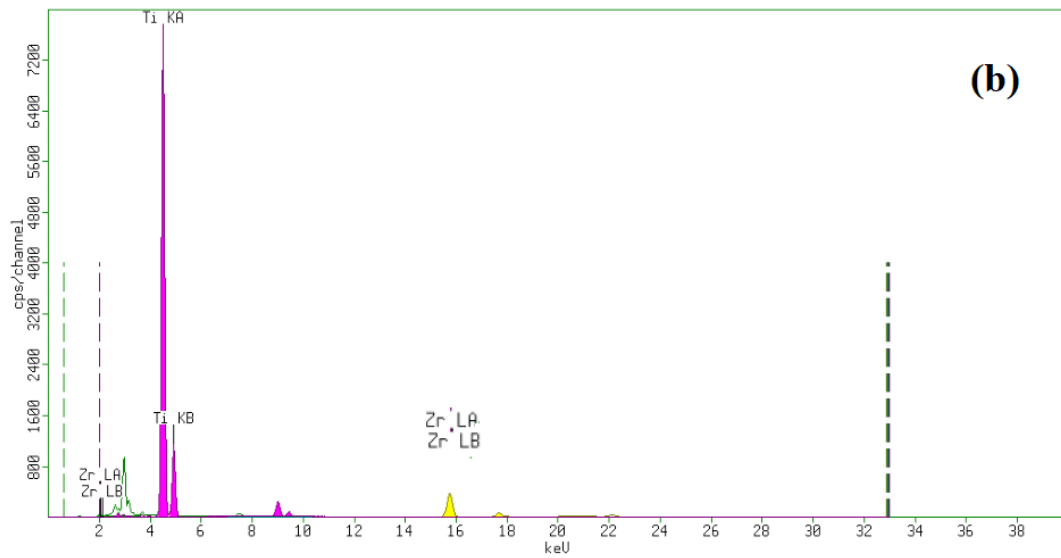

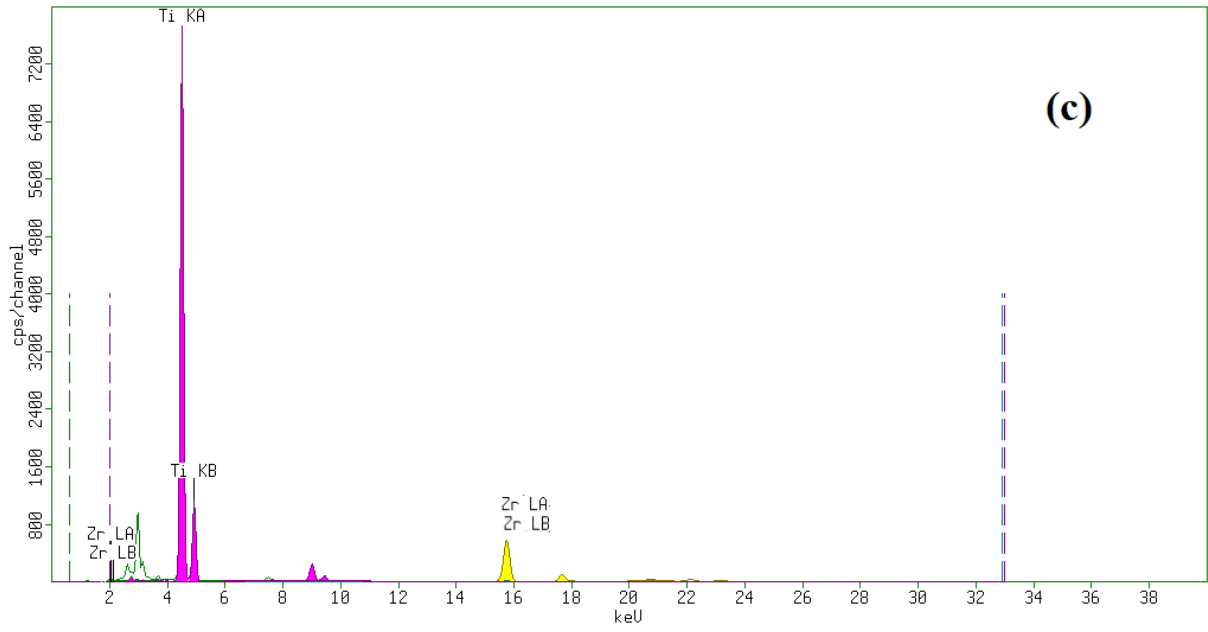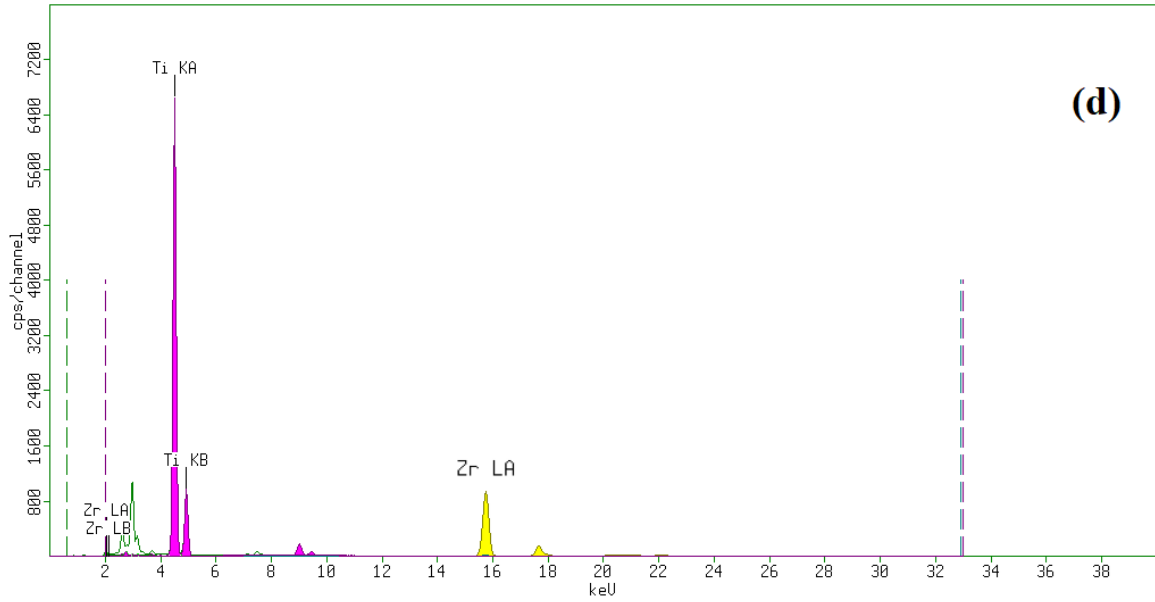

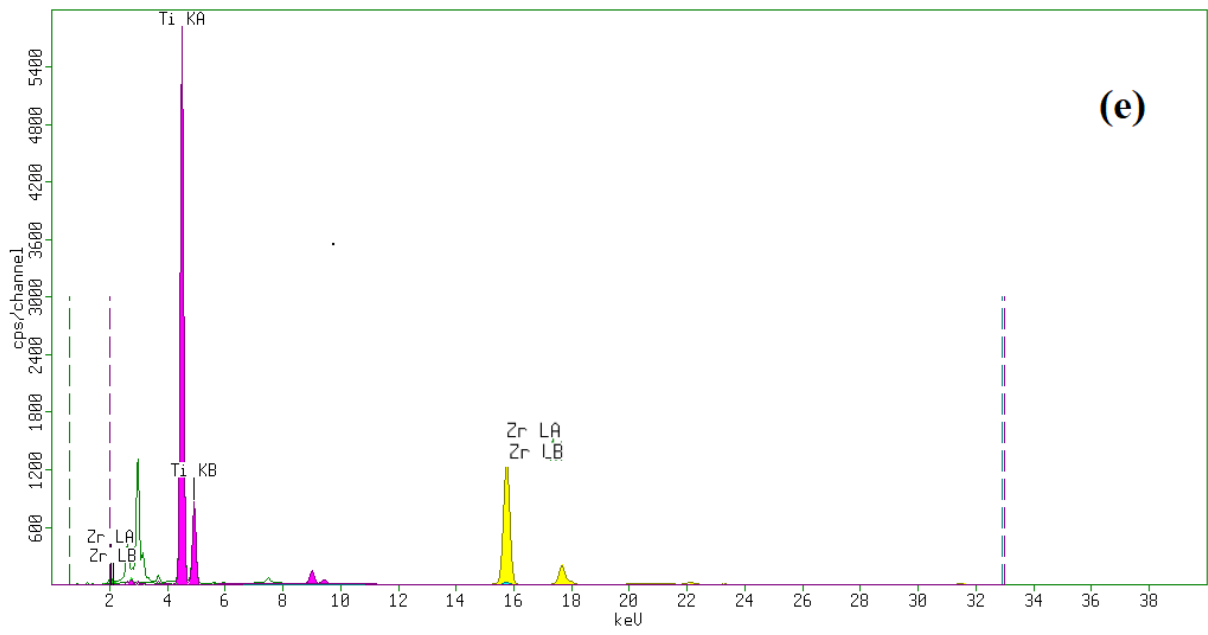

Supplement: d3ra00328k1.pdf [file d3ra00328k1.pdf]
